# Supplementary material
Source: MDPI journal article supplement (https://www.mdpi.com/2072-4292/10/11/1695)
Supplement: s1 [file s1]

Supplementary Materials:

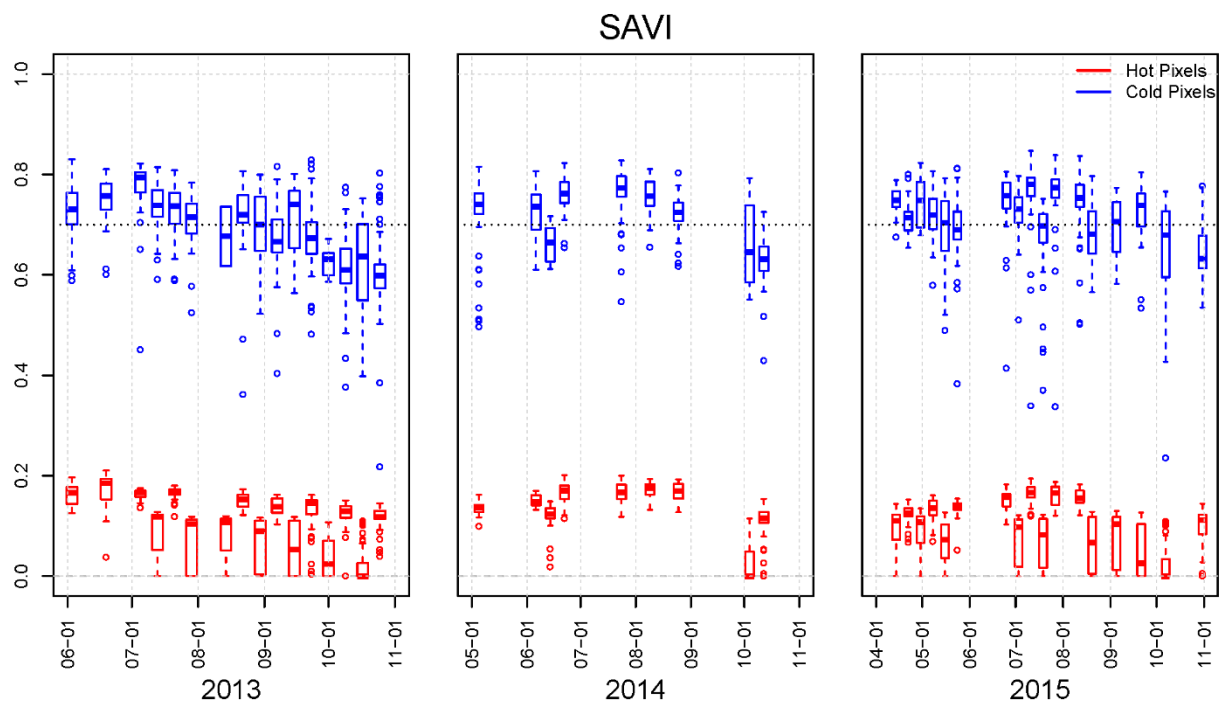

Figure S1: Distribution of SAVI values for hot and cold candidate pixels.
